1 **Impact of various vaccine boosters on neutralization against Omicron following**  
2 **prime vaccinations with inactivated or adenovirus-vectored vaccine**

3 **Authors:** Qingrui Huang<sup>1\*</sup>, Jiawei Zeng<sup>1,2\*</sup>, Qingyun Lang<sup>1,3\*</sup>, Feng Gao<sup>4\*</sup>, Dejun  
4 Liu<sup>4\*</sup>, Siyu Tian<sup>1,2</sup>, Rui Shi<sup>1</sup>, Ling Luo<sup>1,3</sup>, Hao Wang<sup>1,2</sup>, Liping Hu<sup>1,5</sup>, Linrui Jiang<sup>1</sup>,  
5 Yawei Liu<sup>4</sup>, Kailiang Li<sup>4</sup>, Yunbo Wu<sup>4</sup>, Junjie Xu<sup>4</sup>, Wenxi Jiang<sup>4</sup>, Ning Guo<sup>3</sup>, Zhihai  
6 Chen<sup>6</sup>, Xiaohua Hao<sup>6</sup>, Ronghua Jin<sup>6†</sup>, Jinghua Yan<sup>1,2†</sup> and Yufa Sun<sup>4†</sup>

7 **Affiliations:**

8 <sup>1</sup>CAS Key Laboratory of Pathogenic Microbiology and Immunology, Institute of  
9 Microbiology, Chinese Academy of Sciences, Beijing 100101, China.

10 <sup>2</sup>University of Chinese Academy of Sciences, Beijing 101408, China.

11 <sup>3</sup>College of Life Sciences, Anhui Agricultural University, Hefei 230036, China

12 <sup>4</sup>Health Service Department of the Guard Bureau of the General Office of the Central  
13 Committee of the Communist Party of China, Beijing, China

14 <sup>5</sup>Institute of Physical Science and Information, Anhui University, Hefei 230039, China

15 <sup>6</sup>National Center for Infectious Diseases, Beijing Ditan Hospital, Capital Medical  
16 University, Beijing 100015, China

17 <sup>†</sup>Correspondence to: dafa20136725@163.com (Yufa Sun); yanjh@im.ac.cn (Jinghua  
18 Yan); ronghuajin@ccmu.edu.cn (Ronghua Jin).

19 \*These authors contributed equally to this work.

20

21 **Abstract**

22 Since the first report on November 24, 2021, the Omicron SARS-CoV-2 variant is  
23 now overwhelmingly spreading across the world. Two SARS-CoV-2 inactivated  
24 vaccines (IAVs), one recombinant protein subunit vaccine (PRV), and one adenovirus-  
25 vectored vaccine (AdV) have been widely administrated in many countries including  
26 China to pursue herd immunity. Here we investigated cross-neutralizing activities in  
27 341 human serum specimens elicited by full-course vaccinations with IAV, PRV and  
28 AdV, and by various vaccine boosters following prime IAV and AdV vaccinations. We  
29 found that all types of vaccines induced significantly lower neutralizing antibody  
30 titers against the Omicron variant than against the prototype strain. For prime  
31 vaccinations with IAV and AdV, heterologous boosters with AdV and PRV,  
32 respectively, elevated serum Omicron-neutralizing activities to the highest degrees. In  
33 a mouse model, we further demonstrated that among a series of variant-derived RBD-  
34 encoding mRNA vaccine boosters, it is only the Omicron booster that significantly  
35 enhanced Omicron neutralizing antibody titers compared with the prototype booster  
36 following a prime immunization with a prototype S-encoding mRNA vaccine  
37 candidate. In summary, our systematical investigations of various vaccine boosters  
38 inform potential booster administrations in the future to combat the Omicron variant.

## 39 **Introduction**

40 SARS-CoV-2 variant B.1.1.529, first reported on November 24, 2021, is now rapidly  
41 spreading across the world, especially in regions where the Delta variant is  
42 circulating, suggesting its potential of overtaking Delta to become the next dominant  
43 variant. This variant bears up to 37 mutations in the spike protein including 15 within  
44 the receptor binding domain (RBD) (1), the primary target of SARS-CoV-2  
45 neutralizing antibodies (2-4), which raises immense concern on immune evasion. On  
46 November 26, 2021, the World Health Organization (WHO) designated B.1.1.529 as  
47 the fifth variant of concern (VOC) and named it Omicron (5, 6). Two SARS-CoV-2  
48 inactivated vaccines (IAVs, CoronaVac by Sinovac and BBIBP-CorV by Sinopharm)  
49 with a two-dose vaccination regimen, one recombinant protein subunit vaccine (PRV,  
50 ZF2001 by Anhui Zhifei Longcom) with a three-dose vaccination regimen, and one  
51 single-dose recombinant adenovirus-vectored vaccine (AdV, Convidecia by CanSino)  
52 have been given conditional approval for general public use or approved for  
53 emergency use by China (7-11). These four vaccines form the core of China's  
54 vaccination program. To date, several billion doses of those vaccines have been  
55 widely administered in many countries, including China, with the aim of achieving  
56 herd immunity against SARS-CoV-2. Moreover, to combat waning vaccine-elicited  
57 immunity with time and emerging variants, several clinical trials with homogenous or  
58 heterogenous platform vaccine boosters have also been conducted (12-14).

59 Recent preliminary studies have reported that neutralization elicited by one mRNA  
60 vaccine (BNT162b2 by BioNTech in collaboration with Pfizer) is substantially

61 reduced against the Omicron variant (15, 16). The Omicron variant also escapes the  
62 majority of current therapeutic monoclonal antibodies (17, 18). It is urgent to assess  
63 residual neutralization levels against the Omicron variant that are afforded by widely  
64 used vaccines in China, including IAV, PRV, and AdV; it is equally or even more  
65 important to investigate which vaccine booster strategy is able to maximize  
66 neutralization capacity against the Omicron variant. In this study, we systematically  
67 assessed cross-neutralization activity of human antisera against the Omicron variant  
68 elicited by infection or full-course vaccinations with IAV, PRV, or AdV, and by  
69 homologous or heterogenous vaccine boosters. All of the currently approved SARS-  
70 CoV-2 vaccines use the prototype strain-derived proteins as vaccine immunogens. In a  
71 mouse model, we further investigated Omicron-neutralizing activity increase in  
72 magnitude induced by various booster vaccine candidates that were developed based  
73 on different SARS-CoV-2 variants so as to yield key knowledge about guiding  
74 potential booster shots in the future.

## 75 **Results**

76 To investigate the Omicron variant's sensitivity to immunity elicited by infection or  
77 full-course vaccination, we measured the binding, blocking and neutralizing activities  
78 of serum specimens obtained from 25 convalescent individuals (one month since  
79 convalescence), from 30 recipients of two-dose IAV (one month since receipt of the  
80 second dose), from 30 recipients of one-dose AdV (one month since receipt of the  
81 injection), and from 28 recipients of three-dose PRV (six months since receipt of the  
82 third dose) (Table S1). For all of the serum specimens, the binding antibody titers

83 were 5–15 times lower for the Omicron than variant for the prototype strain (Fig. 1A).  
84 Notably, except for one specimen from an individual receiving PRV vaccinations  
85 scored as positive, all of the other specimens lost the blocking activity against the  
86 Omicron variant, whereas nearly all of the specimens exhibited positive blocking  
87 activity against the prototype strain (Fig. 1B). Pseudovirus-based neutralization assays  
88 demonstrated that the geometric mean NT<sub>50</sub> titers against the Omicron variant were  
89 20-, 10-, 6-, and 4-fold lower than those against the prototype strain in serum  
90 specimens from convalescent patients, IAV recipients, AdV recipients, and PRV  
91 recipients, respectively (Fig. 1C). In addition, despite being obtained six months  
92 following full-course vaccination, the serum samples from individuals who had  
93 received PRV vaccinations had the highest neutralizing NT<sub>50</sub> titers against the  
94 Omicron variant, but these titers were approximately 1/5 of the titer of convalescent  
95 sera against the prototype strain (Fig. 1C). In contrast, the neutralizing activity against  
96 the Omicron variant afforded by full-course vaccination with IAV or AdV was less  
97 than 1/20 of the activity of convalescent sera against the prototype strain (Fig. 1C),  
98 suggesting a potential of neutralizing insufficiency against Omicron infection.

99 To explore the impact of a homologous or heterologous booster at 4–8 months  
100 following IAV full-course vaccination on vaccine-induced antibodies against the  
101 Omicron variant, we obtained 42 serum specimens from participants receiving no  
102 vaccine booster, 39 serum specimens from participants receiving homologous IAV  
103 booster (IAV-b) and 45 serum specimens from participants receiving heterologous  
104 PRV booster (PRV-b) (Table S1). The samples were from a single-center, open-label,

105 randomized controlled clinical trial at Beijing Ditan Hospital. An additional seven  
106 specimens from individuals who had received heterologous AdV vaccine booster  
107 following two doses of IAVs 4–8 months earlier from Peking Union Medical  
108 University Hospital were also included (Table S1). Binding, blocking and neutralizing  
109 antibodies titers in all of the groups were markedly higher against the prototype strain  
110 than against the Omicron variant (Fig. 2). The booster dose with IAV, PRV, and AdV  
111 vaccine induced 3-, 7-, and 40-fold increase in Omicron-binding antibody titers  
112 compared with the no-booster control (Fig. 2A). At 4–8 months after full-course  
113 vaccination with IAV, Omicron-blocking antibodies were close to or below the lower  
114 limit of detection (4-fold dilution of plasma), and the blocking positive rate was only  
115 2% (Fig. 2B and Fig. S1). The IAV, PRV, and AdV vaccine boosters led to an increase  
116 of blocking positive rates to 54%, 71%, and 57%, respectively (Fig. 2B and Fig. S1).  
117 For neutralizing antibodies against the Omicron variant, the genomic mean NT<sub>50</sub> titers  
118 were below the lower limit of detection (10-fold dilution of plasma) in the control  
119 group, whereas the titers rose to 113, 207, and 709 in the IAV, PRV and AdV booster  
120 groups, respectively (Fig. 2C and Fig. S2), indicating that the heterologous vaccine  
121 booster with AdV was superior to the homologous IAV vaccine booster in improving  
122 the neutralizing activity against the Omicron variant.

123 To examine the effect of various booster vaccinations following a single-dose prime  
124 vaccination with AdV, we conducted similar tests with serum specimens from  
125 individuals receiving no booster injection (control, n=30), IAV booster (n=30), PRV  
126 booster (n=30), or AdV booster (n=30) at 4–8 months following the primary AdV

127 vaccination (Table S1). All of the samples were collected one month following  
128 booster vaccine injection at Chinese PLA General Hospital. The Omicron-binding  
129 antibody titers were boosted 4-, 25- and 16-fold by the booster injection of  
130 heterologous IAV and PRV vaccines or homologous AdV vaccine, respectively,  
131 compared with the no-booster control (Fig. 3A). For Omicron-blocking antibodies, the  
132 PRV and AdV booster groups exhibited an identical blocking positive rate (80%),  
133 which was higher than that of the control (3%) or IAV booster group (53%) (Fig. 3B  
134 and Fig. S3). The neutralizing NT<sub>50</sub> titers for the Omicron variant in the control group  
135 and the IAV, PRV, and AdV booster groups were 15, 68, 313, and 228, respectively  
136 (Fig. 3C and Fig. S4). Notably, a heterologous PRV booster induced the highest  
137 degree of neutralizing immunity against both the prototype and the Omicron strains  
138 compared with the no-booster control and the other two boosters (Fig. 3C and Fig.  
139 S4).

140 All four of the above-mentioned vaccines have been developed based on the  
141 prototype strain. It is possible to achieve a superior Omicron-neutralizing immunity  
142 by variant vaccine boosters, especially when taking into account that some variants  
143 such as Beta and Delta share some common key mutations with the Omicron variant.  
144 Next, we developed various RBD-encoding mRNA vaccine candidates based on  
145 prototype, Beta, Delta and Omicron strains as booster shots in BALB/c mice  
146 following a single-dose prime injection with a prototype S-encoding mRNA vaccine  
147 candidate, in order to assess the impact on humoral immunity against the Omicron  
148 variant (Fig. 4A). Beta-Delta represents a vaccine combination of Beta and Delta

149 vaccine candidate with either half the other vaccine booster dose. The mice  
150 immunized with a prime injection induced binding and neutralizing but no detectable  
151 blocking antibodies against the Omicron variant, whereas all binding, neutralizing and  
152 blocking antibodies against the prototype were detected in those mice (Fig. 4B-D).  
153 The mice immunized with all types of booster shots had significantly elevated anti-  
154 prototype strain binding, blocking, and neutralizing antibody titers, as well as anti-  
155 Omicron binding and neutralizing antibody titers (Fig. 4B-D). In addition, all of the  
156 booster groups induced significantly higher anti-Beta and anti-Delta binding antibody  
157 titers compared with the no-booster control group (Fig. S5-6). However, only mice  
158 immunized with Delta and Omicron boosters developed significantly higher anti-  
159 Omicron blocking antibody titers compared with no booster control (Fig. 4C).  
160 Notably, the prototype, Beta, Delta, Beta–Delta and Omicron vaccine boosters elicited  
161 Omicron-neutralizing NT<sub>50</sub> titers with values of 423, 1,202, 3,073, 1,548, and 7,710,  
162 respectively, and only those elicited by Omicron booster were significantly higher  
163 than those by the prototype booster (Fig. 4D), suggesting that Omicron-based mRNA  
164 vaccine booster is superior to prototype-based mRNA vaccine booster in elevating  
165 Omicron-neutralizing immunity.

## 166 **Discussion**

167 Since its emergence, the SARS-CoV-2 Omicron variant has been spreading at an  
168 unprecedented speed. Consistent with its far more mutations in spike protein than  
169 other variants, we demonstrated that the Omicron variant remarkably escaped from  
170 neutralizing antibody response elicited by full-course vaccinations of approved IAV



171 and AdV vaccines. To boost anti-Omicron response to sufficiently high titers so as to  
172 provide some protection against Omicron infection, a booster shot may be necessary.  
173 Here we showed that for prime vaccinations with IAV and AdV, a heterologous  
174 vaccine booster with AdV and PRV, respectively, generated the highest increase in  
175 Omicron-neutralizing antibody titers. Although the sample number in AdV booster  
176 with prime IAV vaccinations was small (n=7), the robust increase in the Omicron-  
177 neutralizing activity supports the heterologous AdV booster administration. Currently,  
178 all of the approved vaccines have been developed based on the SARS-CoV-2  
179 prototype strain. Using the mouse model, we further demonstrated that prototype  
180 booster significantly increased the prototype vaccine-elicited Omicron-neutralizing  
181 activity. Although the Beta and Delta variants harbor some identical or similar key  
182 mutations to the Omicron variant, it is only the Omicron-based but not Beta- or Delta-  
183 based vaccine booster that exhibited a significantly higher ability of improving  
184 Omicron-neutralizing immunity. Taken together, our systematical investigation of  
185 impact of various vaccine boosters on improving Omicron-neutralizing immune  
186 response yielded important data to guide possible future booster shots to contain the  
187 Omicron pandemic.

188 Structural comparisons have allowed us to classify RBD-targeted neutralizing  
189 antibodies into four class groups (19). Class 1 and Class 2 antibodies bind on, or in  
190 close proximity to the ACE2-binding footprint, and they can potently neutralize  
191 viruses by blocking the interaction of RBD with ACE2, thereby preventing viral  
192 attachment to host cells (20). As there are concentrated mutations on the ACE2-

193 binding footprint in Omicron RBD, these antibodies showed dramatic or complete  
194 loss of the neutralizing activity against the Omicron variant (17). Thus, Omicron-  
195 blocking titers of human serum specimens showed a substantial decrease compared  
196 with the prototype-blocking titers. There are also class 3 and class 4 neutralizing  
197 antibodies which bind distant from ACE2-binding site and do not block ACE2  
198 interaction. These antibodies may destabilize the spike trimmer protein, and the  
199 antibody epitopes are more conserved in the Omicron variant (17). In theory, these  
200 antibodies are the main contributors of cross-neutralization against the Omicron  
201 variant in prototype-vaccinated human serum. That also leads to a moderate decrease  
202 in Omicron-neutralizing antibody titers in comparison with Omicron-blocking  
203 antibody titers.  
204

205 **Acknowledgments**

206 We thank professor Weijin Huang from National Institutes for Food and Drug Control  
207 (NIFDC) for kindly providing SARS-CoV-2 prototype and Omicron pseudovirus.

208 **Funding:** This work was supported by the Strategic Priority Research Program of the  
209 Chinese Academy of Sciences (XDB29040201) and the National Natural Science

210 Foundation of China (NSFC) (81901680). **Author contributions:** J.Y., Y.S., and

211 Q.H. designed the study; F.G., D.L., Y.L., K.L, Y.W., J.X., W.J., X.H., Z.C., and R.J.

212 collected human serum specimens; J.Z, Q.L., S.T., L.L., H.W., L.H., and L.J.

213 conducted all assays. J.Y., Q.H., and N.G. analyzed and interpreted the data. Q.H.

214 wrote the manuscript. Q.H. and J.Y. discussed and edited manuscript. **Competing**

215 **interests:** The Institute of Microbiology, Chinese Academy of Sciences (IMCAS)

216 holds the patent on ZF2001 vaccine. **Data and materials availability:** All data are

217 available in the main text or the supplementary materials.

218

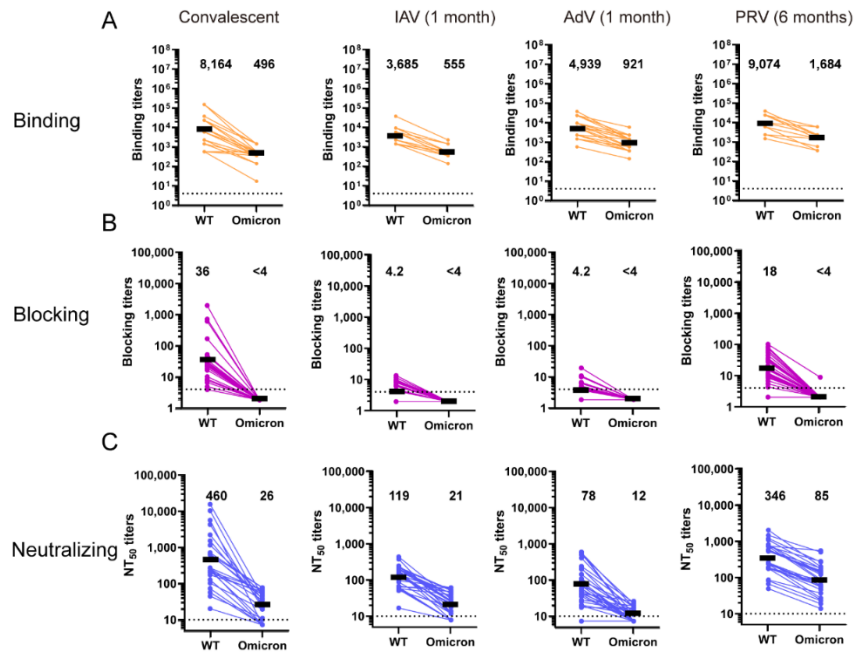

219

220 **Fig. 1. Serum binding, blocking and neutralizing antibody titers of convalescents**

221 **and vaccinated individuals were markedly lower against Omicron compared to**

222 **wild-type SARS-CoV-2. Samples included sera obtained from convalescents (n=25),**

223 **one month after two-dose vaccination with IAV (n=30) or a single-dose AdV (n=30),**

224 **and six months after three-dose vaccination with PRV (n=28). (A) Serum binding**

225 **antibody titers were detected by ELISA assay. Coated antigen was wild type RBD or**

226 **Omicron RBD. Dotted line indicates the limit of detection (>8). (B) hACE2-blocking**

227 **antibody titers were detected by ELISA using wild-type or Omicron spike protein,**

228 **which binds to human ACE2. The dotted line indicates the limit of detection (>4). (C)**

229 **Pseudovirus neutralization titers, expressed as 50% neutralization dilution (NT<sub>50</sub>). The**

230 **pseudoviruses used in the study included both wild-type strain and Omicron. The**

231 **dotted line indicates the limit of detection (>10). IAV represents inactivated vaccines**

232 **(CoronaVac and BBIBP-CorV). PRV represents recombinant protein subunit vaccine**

233 **(ZF2001). AdV represents adenovirus-vectored vaccine (Convidecia).**

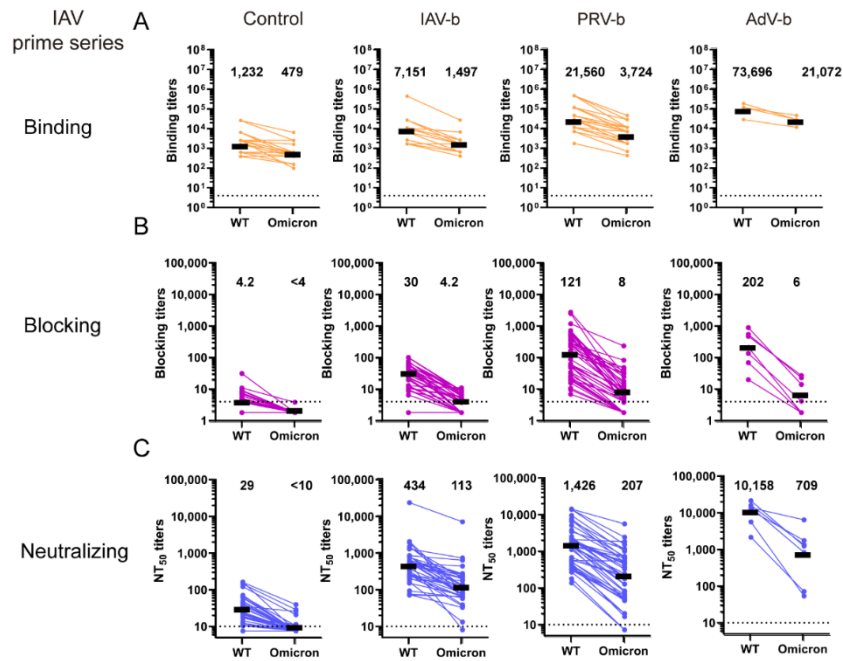

234

235 **Fig. 2. Serum binding, blocking and neutralizing antibody titers of no booster**  
236 **control and various vaccine boosters following prime vaccination with two-dose**  
237 **IAVs.** Samples were obtained from participants without vaccine booster (n=42), with  
238 IAV (IAV-b, n=39), AdV (AdV-b, n=7), or PRV (PRV-b, n=45) boosters following  
239 two-dose prime vaccination with IAV 4-8 months earlier. (A) Serum binding antibody  
240 titers were detected by ELISA. Coated antigen was wild type RBD or Omicron RBD.  
241 Dotted line indicates the limit of detection (>8). (B) hACE2-blocking antibody titers  
242 were detected by ELISA using SARS-CoV-2 wild type and Omicron spike proteins  
243 which bind to human ACE2. The dotted line indicates the limit of detection (>4). (C)  
244 Pseudovirus neutralization titers, expressed as 50% neutralization dilutions (NT<sub>50</sub>).  
245 The pseudoviruses used in the study included wild-type strain and Omicron. The  
246 dotted line indicates the limit of detection (>10). IAV represents inactivated vaccines  
247 (CoronaVac and BBIBP-CorV). PRV represents recombinant protein subunit vaccine  
248 (ZF2001). AdV represents adenovirus-vectored vaccine (Convidecia).

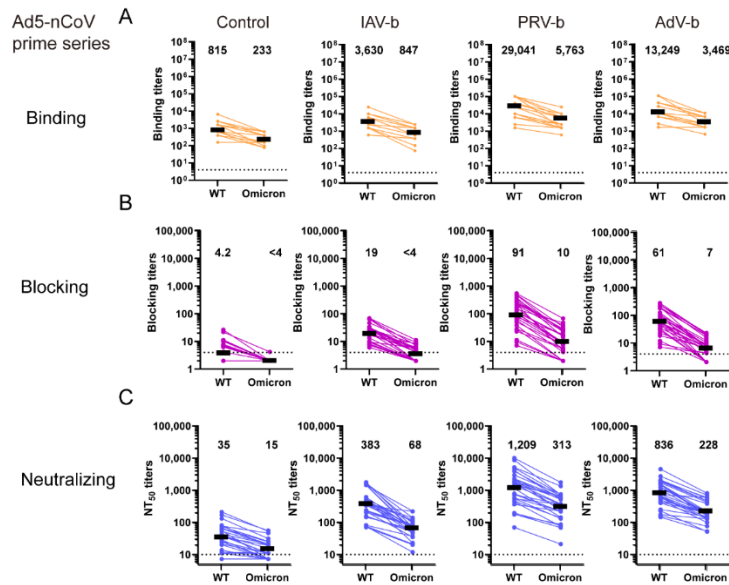

249

250 **Fig. 3. Serum binding, blocking and neutralizing antibody titers of no booster**  
251 **control and various vaccine boosters following a single-dose prime vaccination**  
252 **with AdV.** Samples were obtained from participants without vaccine booster (n=30),  
253 with IAV (IAV-b, n=30), AdV (AdV-b, n=30), or PRV (PRV-b, n=30) boosters  
254 following a single-dose prime vaccination with IAV 4–8 months earlier. (A) Serum  
255 binding antibody titers were detected by ELISA. Coated antigen was wild type RBD  
256 or Omicron RBD. The dotted line indicates the limit of detection (>8). (B) hACE2-  
257 blocking antibody titers were detected by ELISA using SARS-CoV-2 wild type and  
258 Omicron spike proteins which bind to human ACE2. The dotted line indicates the  
259 limit of detection (>4). (C) Pseudovirus neutralization titers, expressed as 50%  
260 neutralization dilutions (NT<sub>50</sub>). The pseudoviruses used in the study included wild-  
261 type strain and Omicron. The dotted line indicates the limit of detection (>10). IAV  
262 represents inactivated vaccines (CoronaVac and BBIBP-CorV). PRV represents  
263 recombinant protein subunit vaccine (ZF2001). AdV represents adenovirus-vectored  
264 vaccine (Convidecia).

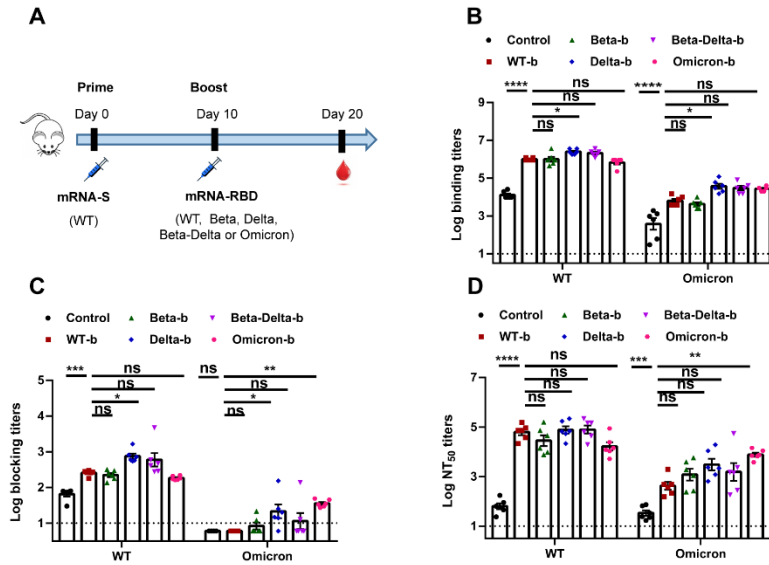

265

266 **Fig. 4. Investigation of various RBD-encoded mRNA vaccine boosters based on**

267 **SARS-CoV-2 prototype, Beta, Delta, Beta plus Delta and Omicron following a**

268 **single prime injection.** Groups of BALB/c mice (n=6) received no booster or

269 different vaccine booster shot following a prime immunization with wild type S-

270 encoding mRNA vaccine candidate via intramuscular route. Mouse serum were

271 obtained at 10 days following the booster injection. (A) Mice immunization schedule.

272 (B) Mouse sera binding antibody titers were detected by ELISA. Coated antigen was

273 wild type RBD or Omicron RBD. The dotted line indicates the limit of detection

274 (>10). (C) hACE2-blocking antibody titers were detected by ELISA using SARS-

275 CoV-2 wild type and Omicron spike proteins which bind to human ACE2. The dotted

276 line indicates the limit of detection (>10). (D) Pseudovirus neutralization titers,

277 expressed as 50% neutralization dilutions (NT<sub>50</sub>). The pseudoviruses used in the study

278 included wild-type strain and Omicron. The dotted line indicates the limit of detection

279 (>10). P values were analyzed with One-Way ANOVA (ns, p>0.05, \*p<0.05,

280 \*\*p<0.01, \*\*\*p<0.001, and \*\*\*\*p<0.0001).

281 **Reference**

- 282 1. E. Cameroni *et al.*, Broadly neutralizing antibodies overcome SARS-CoV-2  
283 Omicron antigenic shift. *Nature*, (2021).
- 284 2. Q. Huang *et al.*, A single-dose mRNA vaccine provides a long-term protection  
285 for hACE2 transgenic mice from SARS-CoV-2. *Nature communications* **12**,  
286 776 (2021).
- 287 3. Y. J. Park *et al.*, Antibody-mediated broad sarbecovirus neutralization through  
288 ACE2 molecular mimicry. *Science (New York, N.Y.)*, eabm8143 (2022).
- 289 4. R. Shi *et al.*, A human neutralizing antibody targets the receptor-binding site of  
290 SARS-CoV-2. *Nature* **584**, 120-124 (2020).
- 291 5. L. Liu *et al.*, Striking Antibody Evasion Manifested by the Omicron Variant of  
292 SARS-CoV-2. *Nature*, (2021).
- 293 6. D. Planas *et al.*, Considerable escape of SARS-CoV-2 Omicron to antibody  
294 neutralization. *Nature*, (2021).
- 295 7. M. Tanriover *et al.*, Efficacy and safety of an inactivated whole-virion SARS-  
296 CoV-2 vaccine (CoronaVac): interim results of a double-blind, randomised,  
297 placebo-controlled, phase 3 trial in Turkey. *Lancet (London, England)* **398**,  
298 213-222 (2021).
- 299 8. S. Xia *et al.*, Safety and immunogenicity of an inactivated COVID-19 vaccine,  
300 BBIBP-CorV, in people younger than 18 years: a randomised, double-blind,  
301 controlled, phase 1/2 trial. *Lancet Infect Dis*, (2021).
- 302 9. S. Yang *et al.*, Safety and immunogenicity of a recombinant tandem-repeat



- 303 dimeric RBD-based protein subunit vaccine (ZF2001) against COVID-19 in  
304 adults: two randomised, double-blind, placebo-controlled, phase 1 and 2 trials.  
305 *Lancet Infect Dis*, (2021).
- 306 10. F.-C. Zhu *et al.*, Immunogenicity and safety of a recombinant adenovirus type-  
307 5-vectored COVID-19 vaccine in healthy adults aged 18 years or older: a  
308 randomised, double-blind, placebo-controlled, phase 2 trial. *Lancet (London,*  
309 *England)*, (2020).
- 310 11. L. Dai *et al.*, A Universal Design of Betacoronavirus Vaccines against  
311 COVID-19, MERS, and SARS. *Cell* **182**, 722-733.e711 (2020).
- 312 12. Y. Cao *et al.*, Humoral immunogenicity and reactogenicity of CoronaVac or  
313 ZF2001 booster after two doses of inactivated vaccine. *Cell research* **32**, 107-  
314 109 (2022).
- 315 13. D. Hillus *et al.*, Safety, reactogenicity, and immunogenicity of homologous  
316 and heterologous prime-boost immunisation with ChAdOx1 nCoV-19 and  
317 BNT162b2: a prospective cohort study. *The Lancet. Respiratory medicine* **9**,  
318 1255-1265 (2021).
- 319 14. J. Ai *et al.*, Recombinant protein subunit vaccine booster following two-dose  
320 inactivated vaccines dramatically enhanced anti-RBD responses and  
321 neutralizing titers against SARS-CoV-2 and Variants of Concern. *Cell research*  
322 **32**, 103-106 (2022).
- 323 15. W. Dejnirattisai *et al.*, Reduced neutralisation of SARS-CoV-2 omicron  
324 B.1.1.529 variant by post-immunisation serum. *Lancet (London, England)*,

- 325 (2021).
- 326 16. S. Cele *et al.*, SARS-CoV-2 Omicron has extensive but incomplete escape of  
327 Pfizer BNT162b2 elicited neutralization and requires ACE2 for infection.  
328 *medRxiv*, 2021.2012.2008.21267417 (2021).
- 329 17. W. Dejnirattisai *et al.*, Omicron-B.1.1.529 leads to widespread escape from  
330 neutralizing antibody responses. *bioRxiv*, (2021).
- 331 18. E. Cameroni *et al.*, Broadly neutralizing antibodies overcome SARS-CoV-2  
332 Omicron antigenic shift. *bioRxiv*, (2021).
- 333 19. S. Tian *et al.*, Distinct BCR repertoires elicited by SARS-CoV-2 RBD and S  
334 vaccinations in mice. *Cell discovery* **7**, 91 (2021).
- 335 20. C. Barnes *et al.*, SARS-CoV-2 neutralizing antibody structures inform  
336 therapeutic strategies. *Nature* **588**, 682-687 (2020).
- 337

338 **Materials and Methods**

339 Human serum samples

340 Human serum specimens were collected at Peking Union Medical College Hospital,  
341 Beijing Ditan Hospital, 309 Hospital of the Chinese People's Liberation Army,  
342 Fangzhuang Community Health Service Center, and the Institute of Microbiology of  
343 the Chinese Academy of Sciences (IMCAS). The samples were selected based on  
344 availability, and the specimens were obtained from individuals of different genders  
345 with no specific inclusion/exclusion criteria. Participants included convalescents from  
346 COVID-19, participants who had received full-course vaccination with inactivated  
347 vaccines, recombinant protein subunit vaccines, and adenovirus-vectored vaccines, as  
348 well as various types of vaccine boosters.

349 Ethics statement

350 This study was reviewed and approved by IMCAS (APIMCAS2021159). This study  
351 was conducted in strict accordance with the recommendations in the “Guide for the  
352 Care and Use of Laboratory Animals” issued by the Ethics Committee of IMCAS.  
353 Informed consent was obtained from all of the participants.

354 Cells, pseudoviruses, and animals

355 HEK293T (ATCC, CRL-1573) cells and Vero E6 cells (ATCC CRL-1586) were  
356 cultured at 37°C in Dulbecco’s modified Eagle’s medium (DMEM) supplemented  
357 with 10% fetal bovine serum (FBS). Pseudovirus of the SARS-CoV-2 wild type strain  
358 and the Omicron variant were provided by Professor Weijin Huang from National  
359 Institutes for Food and Drug Control. Specific-pathogen-free (SPF) BALB/c 6-8-  
360 week-old female mice were purchased from Beijing Vital River Animal Technology

361 Co., Ltd (licensed by Charles River). All of the mice used in this study are were  
362 housed and bred in a temperature-, humidity- and light cycle-controlled SPF mouse  
363 facilities in IMCAS (20±2°C; 50±10%; light, 7:00-19:00; dark, 19:00-7:00).

#### 364 Protein expression and purification

365 The objective recombinant protein sequences carried on the pCAGGS vector were  
366 expressed via HEK293T cells. The supernatant of cell culture was collected five days  
367 post-transfection. Initially, a HisTrap excel 5 mL column (GE Healthcare) was used to  
368 isolate proteins. The medium of samples collected from the HisTrap columns was  
369 substituted with PBS solution and then further purified with the Superdex 200 column  
370 (GE Healthcare). Lastly, SDS-PAGE was performed to assess the purity of the  
371 protein.

#### 372 ELISA

373 SARS-CoV-2 RBD monomer proteins were coated with 50 mM carbonate-  
374 bicarbonate buffer (pH 9.6) in Corning<sup>®</sup> 96-well Clear Polystyrene Microplates at 200  
375 ng per well. The microplates were blocked by 5% skimmed milk at 37°C for one hour,  
376 and then the milk was discarded. The microplates were incubated with 100 µL two-  
377 fold serially diluted mice serum at 37°C for one hour. The HRP-labeled anti-mouse Fc  
378 secondary antibody (Yeesen) was added after washing the microplates three times.  
379 Then, 50 µL of 3, 3', 5, 5'-tetramethylbenzidine (Beyotime Biotechnology) was used  
380 as a substrate and 50 µL of 2 M sulphuric acid was used to stop the reactions. The  
381 absorbance was measured at 450 nm using a microplate reader (PerkinElmer). The  
382 end-point antibody titers were defined as the highest dilution of the serum that

383 produced an optical absorption value (OD<sub>450</sub>) 2.1 times higher than the background  
384 value.

#### 385 hACE2-receptor-blocking assay

386 hACE2-receptor-blocking antibodies were determined by ELISA. Corning® 96-well  
387 Clear Polystyrene Microplates were coated with 20 µg/mL human ACE2 (hACE2)  
388 protein overnight at 4°C. Serially diluted sera from groups of immunized mice or  
389 humans was added into coated wells and then 50 ng/mL of histidine-tagged SARS-  
390 CoV-2 S proteins was added into wells for two hours at 37°C. Meanwhile, a set of  
391 negative control without S protein and a set of positive control without serum were  
392 necessary. After incubation and washing five times, Anti-His-tag-HRP was added and  
393 incubated for one hour. Then, 50 µL of 3, 3', 5, 5'-tetramethylbenzidine (Beyotime  
394 Biotechnology) was used as a substrate and 50µL of 2M sulphuric acid was used to  
395 stop the reactions. The absorbance was measured at 450 nm using a microplate reader  
396 (Perkin Elmer). The reciprocal of the highest serum dilution that resulted in 50%  
397 inhibition of receptor binding was used as the titer of the serum.

#### 398 Pseudovirus neutralization assay

399 96 Well White Plates (WHB) were used to detect the neutralization potency. Sera  
400 from groups of mice and humans were serially diluted in DMEM medium  
401 supplemented with 10% FBS. Pseudoviruses were diluted to  $2 \times 10^4$  TCID<sub>50</sub>/mL using  
402 DMEM (10% FBS), and then 50 µL of the diluted pseudoviruses was added to each  
403 well. Meanwhile, a set of negative controls with only medium and a set of positive  
404 controls with only pseudovirus were necessary. After incubation at 37°C for one

405 hour,  $2 \times 10^4$  Vero E6 per cell were added to each well to make a final volume of  
406 200  $\mu$ l, which was incubated for 24 hours in a 37°C, 5% CO<sub>2</sub> incubator. After  
407 incubation, the supernatant in the wells was discarded and 100  $\mu$ L of luciferase  
408 detection reagent (PerkinElmer, Inc.) was added. The reaction was shaken at room  
409 temperature for two minutes and the fluorescence values were read in a  
410 chemiluminescence detector (Promega GloMax). The neutralization NT<sub>50</sub> titer was  
411 defined as the fold-dilution of serum necessary for 50% inhibition of luciferase  
412 activity in comparison with virus control samples.

#### 413 mRNA production

414 mRNA was produced using T7 RNA polymerase on linearized plasmids (synthesized  
415 by Genescript) encoding codon-optimized SARS-CoV-2 S6P protein or prototype,  
416 Beta, Delta, or Omicron RBD glycoprotein (residues 319-541). The mRNA was  
417 transcribed to contain a 104 nucleotide-long poly(A) tail, and 1-methylpseudourine-  
418 5'-triphosphate was used instead of UTP to generate modified nucleoside-containing  
419 mRNA. The mRNA was purified by overnight LiCl precipitation at -20°C, centrifuged  
420 at 18,800×g for 30 min at 4°C to pellet, washed with 75% EtOH, centrifuged at  
421 18,800×g for 1 min at 4°C, and resuspended in RNase-free water. The purified mRNA  
422 was analyzed by agarose gel electrophoresis and stored at -80°C until use.

#### 423 Lipid-nanoparticle encapsulation of mRNA

424 mRNA was encapsulated in LNPs using a self-assembly process in which an aqueous  
425 solution of mRNA at pH=4.0 was rapidly mixed with a solution of lipids dissolved in  
426 ethanol. LNPs used in this study contained an ionizable cationic lipid,

427 phosphatidylcholine, cholesterol, and PEG-lipid at a ratio of 50:10:38.5:1.5 mol/mol  
428 and were encapsulated at an mRNA to lipid ratio of around 0.05 (wt/wt). The  
429 formulations were then diafiltrated against 100 x volume of Phosphate Buffered  
430 Saline (PBS) through a tangential-flow filtration (TFF) membrane with 10 kD  
431 molecular weight cut-offs (Sartorius Stedim Biotech), concentrated to a required  
432 concentration, passed through a 0.22µm filter, and stored at 4°C with a concentration  
433 of RNA of about 1 mg/mL.

#### 434 Animal experiments

435 For immunization, 6-8-week-old female BALB/c mice were primarily vaccinated with  
436 4 µg S-encoding mRNA vaccine candidate via intramuscular (i.m.) route. At 10 days  
437 following primary immunization, booster injections with PBS as negative control or  
438 different variant RBD-encoding mRNA vaccine candidates were administered with a  
439 dose of 4 µg. Serum samples were collected at 10 days following booster vaccination,  
440 inactivated at 56°C for 30 min, and stored at -80°C until use.

#### 441 Statistical analysis

442 All of the data are expressed as the mean ± standard error of the mean. For all of the  
443 analyses, P values were obtained from Student's t-test (unpaired, two tailed) or One-  
444 way ANOVA test. All of the graphs were generated with GraphPad Prism version 7.0  
445 software.

446

447

448

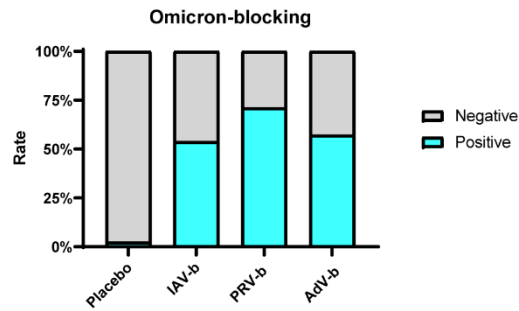

449

450 **Fig. S1. Rate of positive samples for hACE2 blocking antibody detection against**

451 **Omicron, relative to Fig. 2B.** Samples were obtained from participants without

452 vaccine booster (n=42), with IAV (IAV-b, n=39), AdV (AdV-b, n=7), or PRV (PRV-b,

453 n=45) boosters following two-dose prime vaccination with IAV 4–8 months earlier.

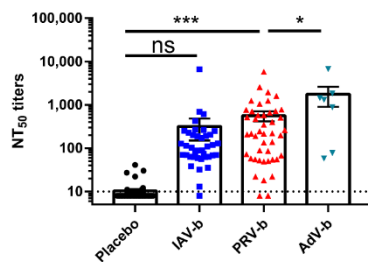

454

455 **Fig. S2. Neutralization titers against Omicron pseudovirus of non-boostered and**

456 **boostered with different vaccines following previously vaccinated with IAVs,**

457 **relative to Fig. 2C.**

458 Samples were obtained from participants without vaccine booster (n=42), with IAV

459 (IAV-b, n=39), AdV (AdV-b, n=7), or PRV (PRV-b, n=45) boosters following two-

460 dose prime vaccination with IAV 4–8 months earlier. The values were representative

461 of mean  $\pm$  SEM. P values were analyzed with Student's t-test (ns,  $p > 0.05$ , \* $p < 0.05$ ,

462 \*\* $p < 0.01$ , \*\*\* $p < 0.001$ , and \*\*\*\* $p < 0.0001$ ).



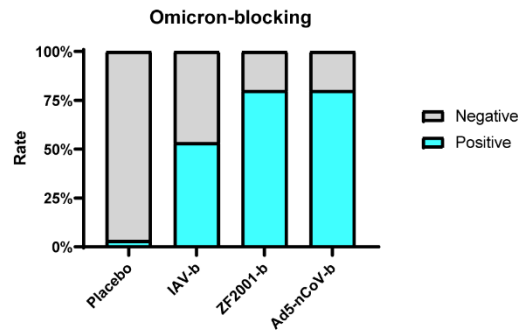

463

464 **Fig. S3. Rate of positive samples for hACE2 blocking antibody detection against**

465 **Omicron, relative to Fig. 3B.** Samples were obtained from participants without

466 vaccine booster (n=30), with IAV (IAV-b, n=30), AdV (AdV-b, n=30), or PRV (PRV-

467 b, n=30) boosters following a single-dose prime vaccination with IAV 4–8 months

468 earlier.

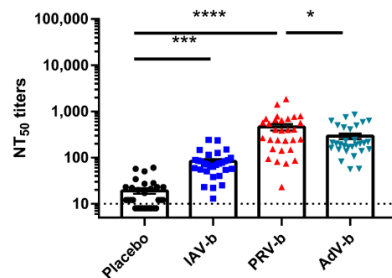

469

470 **Fig. S4. Neutralization titers against Omicron pseudovirus of non-boosted and**

471 **boosted with different vaccines following previous vaccination with AdV, relative**

472 **to Fig. 3C.**

473 Samples were obtained from participants without vaccine booster (n=30), with IAV

474 (IAV-b, n=30), AdV (AdV-b, n=30), or PRV (PRV-b, n=30) boosters following a

475 single-dose prime vaccination with IAV 4–8 months earlier. The values represent

476 mean  $\pm$  SEM. P values were analyzed with t-test (ns,  $p > 0.05$ , \* $p < 0.05$ , \*\* $p < 0.01$ ,

477 \*\*\* $p < 0.001$ , and \*\*\*\* $p < 0.0001$ ).

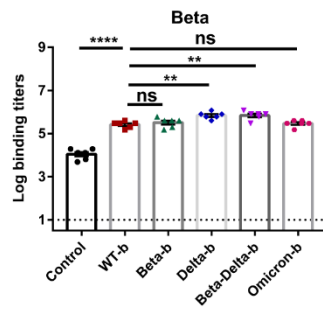

478

479 **Fig. S5. Beta-binding titers of various RBD-encoded mRNA vaccine boosters**

480 **based on SARS-CoV-2 prototype, Beta, Delta, Beta plus Delta and Omicron**

481 **following a single prime injection, relative to Fig. 4.** The dotted line indicates the

482 limit of detection ( $>10$ ). P values were analyzed with One-Way ANOVA (ns,  $p > 0.05$ ,

483 \* $p < 0.05$ , \*\* $p < 0.01$ , \*\*\* $p < 0.001$ , and \*\*\*\* $p < 0.0001$ ).

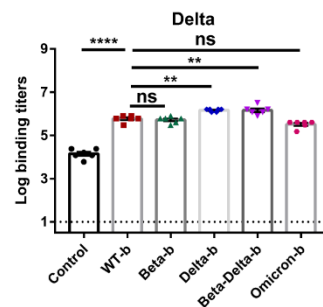

484

485 **Fig. S6. Delta-binding titers of various RBD-encoded mRNA vaccine boosters**

486 **based on SARS-CoV-2 prototype, Beta, Delta, Beta plus Delta and Omicron**

487 **following a single prime injection, relative to Fig. 4.** The dotted line indicates the

488 limit of detection ( $>10$ ). P values were analyzed with One-Way ANOVA (ns,  $p > 0.05$ ,

489 \* $p < 0.05$ , \*\* $p < 0.01$ , \*\*\* $p < 0.001$ , and \*\*\*\* $p < 0.0001$ ).

490

**Table S1 Characteristics of participants**

|                                          | Group        | Number | Male (%) | Female (%) | Age years mean (SD) | Immunization Regimen |
|------------------------------------------|--------------|--------|----------|------------|---------------------|----------------------|
| Infection                                | Convalescent | 25     | 15 (60%) | 10 (40%)   | 37.3 (14.4)         | No                   |
|                                          | IAV          | 30     | 13 (43%) | 17 (57%)   | 67.8 (7.5)          | 0, 1 month           |
| Full-course vaccinations                 | AdV          | 30     | 9 (30%)  | 21 (70%)   | 37.5 (7.6)          | 0 month              |
|                                          | PRV          | 28     | 10 (36%) | 18 (64%)   | 32.0 (8.0)          | 0, 1, 2 months       |
|                                          | no booster   | 42     | 12 (29%) | 30 (71%)   | 37.1 (8.0)          | 0, 1 month           |
| Prime vaccinations with two doses of IAV | IAV booster  | 39     | 10 (26%) | 29 (74%)   | 37.9 (11.0)         | 0, 1, 4-8 months     |
|                                          | PRV booster  | 45     | 13 (29%) | 32 (71%)   | 41.1 (8.2)          | 0, 1, 4-8 months     |
|                                          | AdV booster  | 7      | 3 (43%)  | 4 (57%)    | 33.1 (4.5)          | 0, 1, 4-8 months     |
| Prime vaccinations with one dose of AdV  | no booster   | 30     | 6 (20%)  | 24 (80%)   | 36.0 (7.2)          | 0 month              |
|                                          | IAV booster  | 30     | 6 (20%)  | 24 (80%)   | 35.0 (4.2)          | 0, 4-8 months        |
|                                          | PRV booster  | 30     | 7 (23%)  | 23 (77%)   | 38.7 (1.5)          | 0, 4-8 months        |
|                                          | AdV booster  | 30     | 7 (23%)  | 23 (77%)   | 35.8 (8.9)          | 0, 4-8 months        |
